# Supplementary material for: Three-dimensional angiography fused with CT/MRI for multimodal imaging of nanoparticles based on Ba4Yb3F17:Lu3+,Gd3+
Source: Royal Society of Chemistry journal article supplement (doi:10.1039/c8nr03054e), 2018-01-01
Supplement: c8nr03054e1.pdf [file c8nr03054e1.pdf]

## Electronic Supplementary Information

### Three-dimensional Angiography Fused with CT/MRI for Multimodal Imaging of Nanoparticles Based on $\text{Ba}_4\text{Yb}_3\text{F}_{17}$ : $\text{Lu}^{3+}$ , $\text{Gd}^{3+}$

Sihan Ma<sup>a,b</sup>, Jiaxin Zhang<sup>b</sup>, Shibo Xia<sup>b</sup>, Wenyan Yin<sup>b</sup>, Yanxia Qin<sup>b</sup>, Runhong Lei<sup>b</sup>, Jianglong Kong<sup>b</sup>,  
Linqiang Mei<sup>b</sup>, Juan Li<sup>\*,b</sup>, Gengmei Xin<sup>\*,b</sup> and Gongping Li<sup>\*,a</sup>

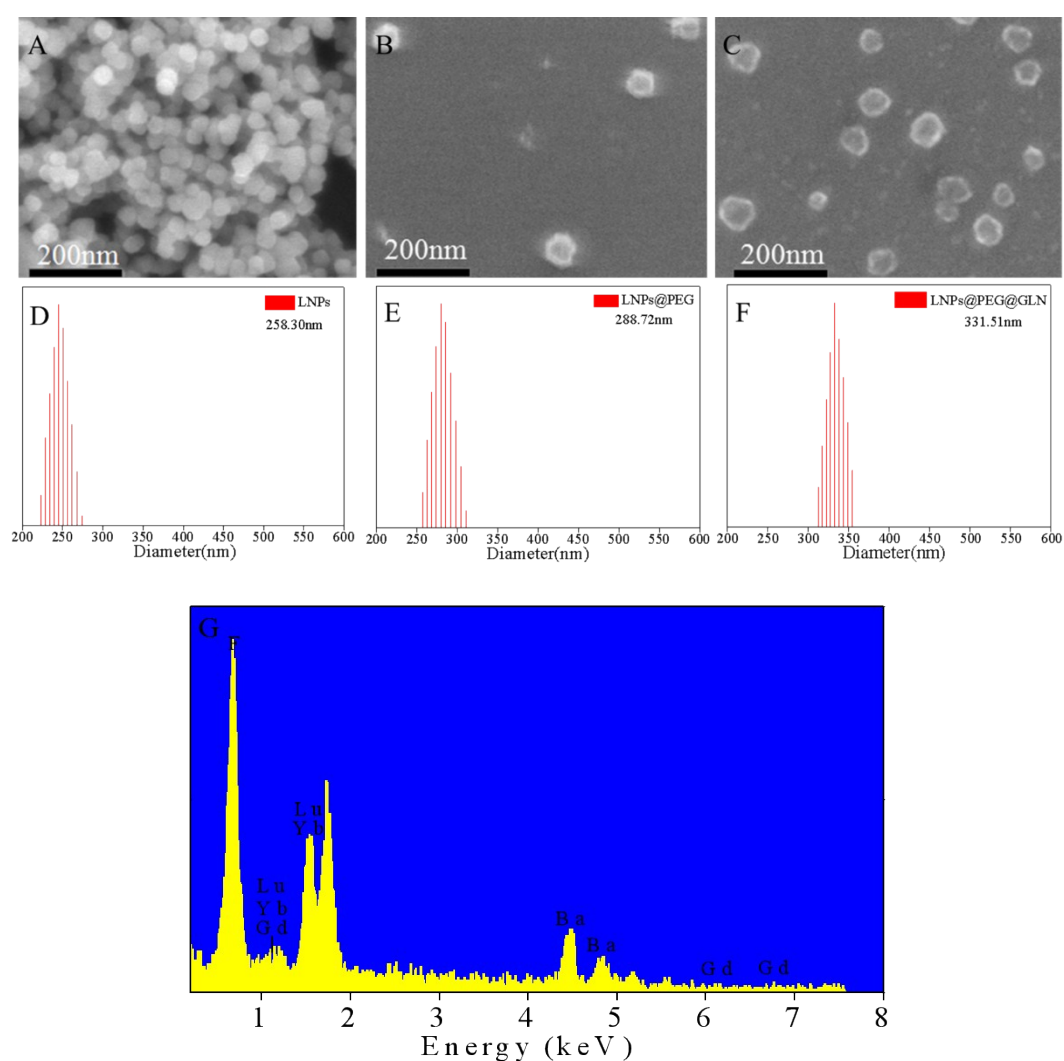

**Figure S1.** SEM and DLS images of multi-functional contrast agents. SEM images of (A)

LNs (B) LNs@PEG (C) LNs@PEG@GLN, DLS images of (D)-(F) hydration particle size

distribution of contrast agents LNPs, LNPs@PEG and LNPs@PEG@GLN, respectively. (G)

EDS image of LNPs. Displaying the composition of nanoparticles.

**Table S1.** Concentration-dependent CT value *in vitro*

| Concentration       | 0mg/ml       | 1.2mg/ml     | 2.5mg/ml     | 5.3mg/ml     | 7.9mg/ml     |
|---------------------|--------------|--------------|--------------|--------------|--------------|
| <b>LNPs@PEG@GLN</b> | <b>161.1</b> | <b>210.6</b> | <b>258.7</b> | <b>324.5</b> | <b>426.3</b> |
| <b>Ioversol</b>     | <b>168.3</b> | <b>201.5</b> | <b>250.1</b> | <b>305.3</b> | <b>375.5</b> |

**Table S2.** MRI T<sub>1</sub>-weighted value *in vitro*

| Gd <sup>3+</sup> Concentration (μM)   | 0               | 0.0113          | 0.0226          | 0.0294          | 0.0362          |
|---------------------------------------|-----------------|-----------------|-----------------|-----------------|-----------------|
| <b>LNPs@PEG@GLN (1/T<sub>1</sub>)</b> | <b>0.000339</b> | <b>0.000617</b> | <b>0.000951</b> | <b>0.001062</b> | <b>0.001255</b> |

**Table S3.** MRI T<sub>2</sub>-weighted value *in vitro*

| Concentration (μM)                    | 0              | 0.071          | 0.141          | 0.184          | 0.226          |
|---------------------------------------|----------------|----------------|----------------|----------------|----------------|
| <b>LNPs@PEG@GLN (1/T<sub>2</sub>)</b> | <b>0.00142</b> | <b>0.08104</b> | <b>0.14492</b> | <b>0.17857</b> | <b>0.20408</b> |

**Table S4.** Fluorescence uptake value *in vitro*

| Concentration (mg/ml) | 0.5 | 1 | 3 | 6 | 9 |
|-----------------------|-----|---|---|---|---|
|-----------------------|-----|---|---|---|---|

---

**LNPs@PEG@GLN****0.98****2.03****2.50****3.48****9.36**

---

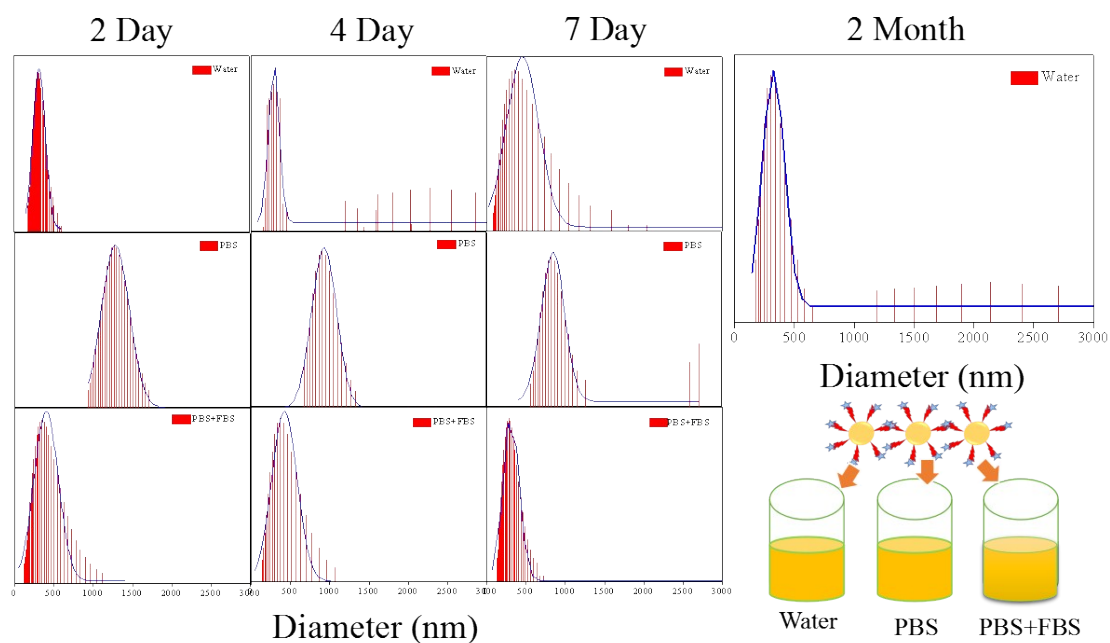

Figure S2. DLS images for LNPs@PEG@GLN which were placed in different solution (water, PBS and PBS+FBS) at different time. Indicated the stability of nanoparticles at different environment.

**Table S5.** CT value for different organic *in vivo*

---

| Time (min)  | 0     | 2     | 5     | 15    |
|-------------|-------|-------|-------|-------|
| LNPs(liver) | 332.4 | 345.3 | 340.0 | 425.3 |

---

|                          |               |               |               |               |
|--------------------------|---------------|---------------|---------------|---------------|
| <b>LNPs(spleen)</b>      | <b>262.9</b>  | <b>255.3</b>  | <b>337.6</b>  | <b>528.2</b>  |
| <b>LNPs(bladder)</b>     | <b>1472.1</b> | <b>1564.1</b> | <b>1468.2</b> | <b>1505.3</b> |
| <b>Ioversol(kidney)</b>  | <b>486.0</b>  | <b>528.0</b>  | <b>615.5</b>  | <b>533.5</b>  |
| <b>Ioversol(bladder)</b> | <b>332.4</b>  | <b>1021.2</b> | <b>1686.5</b> | <b>4620.0</b> |
| <b>Ioversol(spleen)</b>  | <b>356.7</b>  | <b>335.2</b>  | <b>369.1</b>  | <b>387.2</b>  |

---

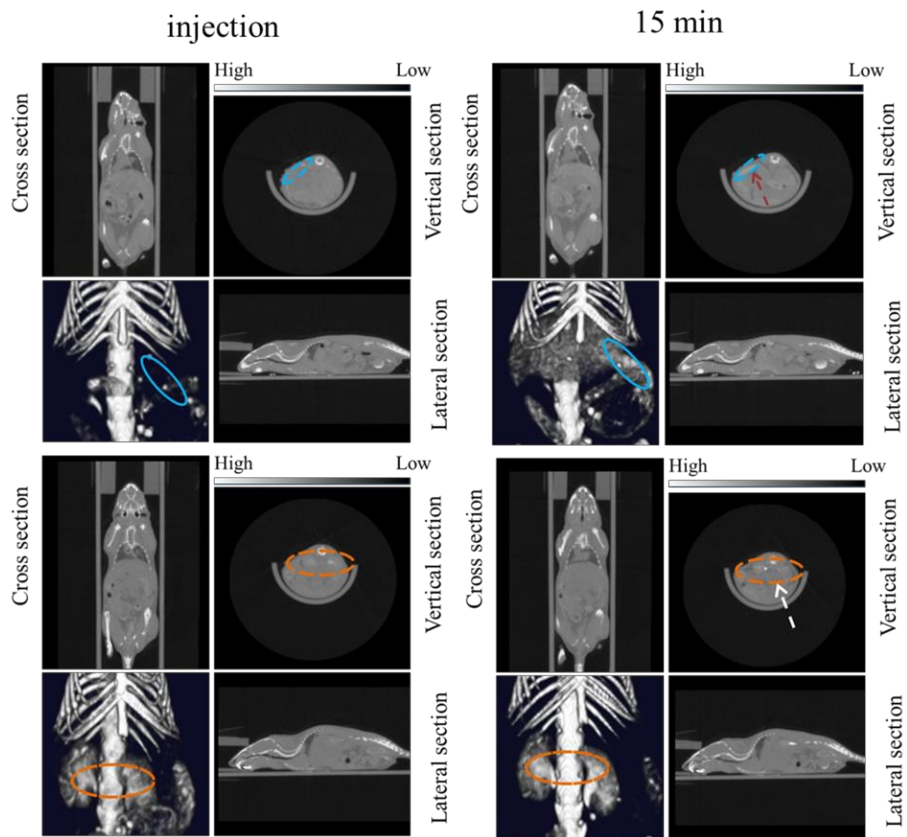

Figure S3. CT 2D flat images before and after injection of LNPs@PEG@GLN (top) and Ioversol (bottom).

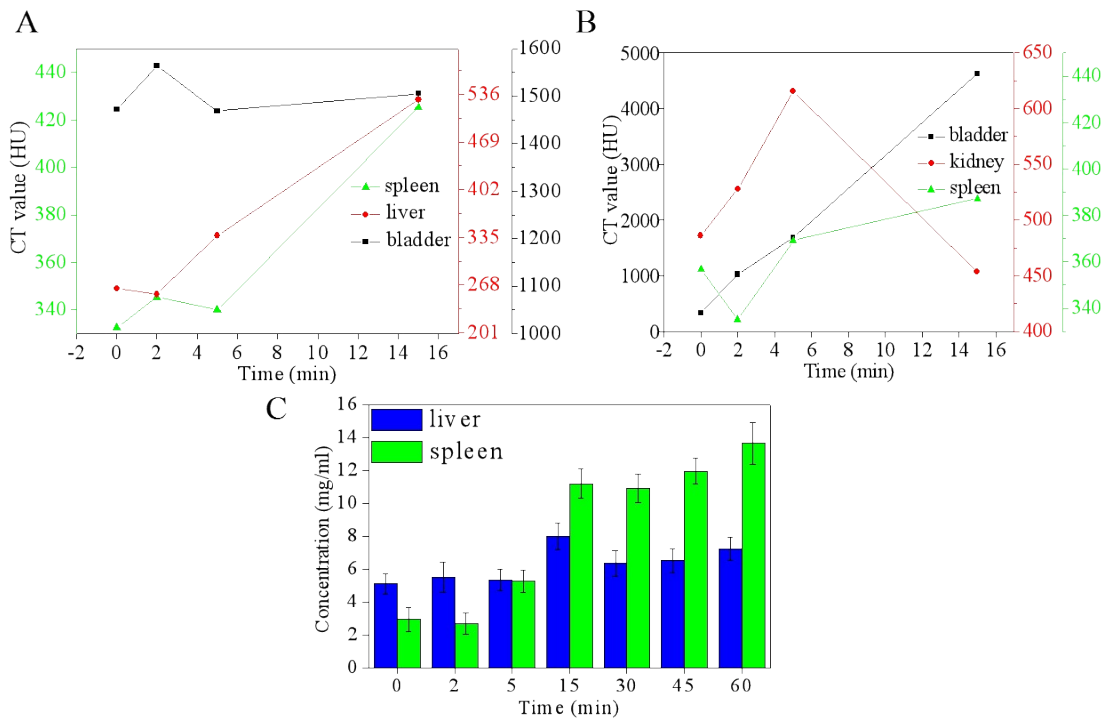

Figure S4 **Bio-distribution of multi-functional LNPs@PEG@GLN.** (A) CT signal of LNPs@PEG@GLN and (B) Ioversol at different tissues at different time respectively. (C) Dose of LNPs@PEG@GLN at different time points. Indicated the distribution of nanoparticles at different tissues.

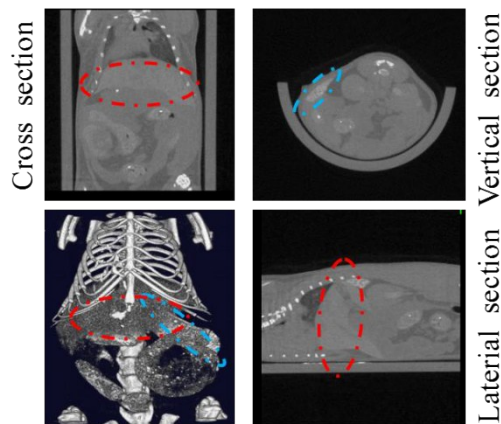

Figure S5. High resolution CT 2D flat images after injection of LNPs@PEG@GLN.

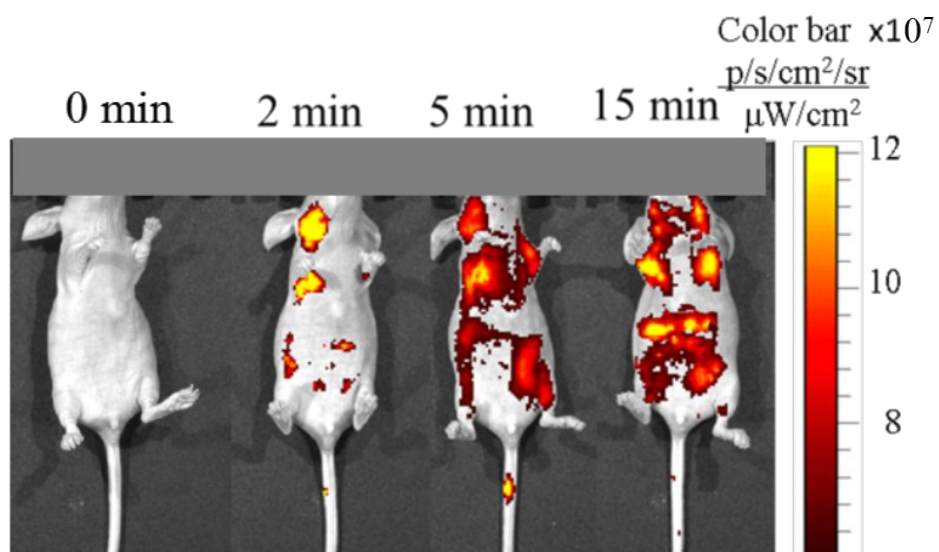

Figure S6 2D fluorescence images at different time points (0 min, 2 min, 5 min, and 15 min) after injection of LNPs@PEG@GLN through the tail vein.

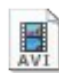

113002. avi

Movie S: 3D fluorescence imaging animation
